# Supplementary material
Source: PubMed Central journal article supplement (PMC4420737)
Supplement: NIHMS681010-supplement-supplement.pdf [file NIHMS681010-supplement-supplement.pdf]

# **Supplemental Material**

## **Interactions of Amino Acid Side Chain Analogs within Membrane Environments**

Vahid Mirjalili<sup>1,2</sup>, Michael Feig<sup>2,3,\*</sup>

Department of Mechanical Engineering<sup>1</sup>, Department of Biochemistry and Molecular Biology<sup>2</sup>, Department of Chemistry<sup>3</sup>,  
Michigan State University  
East Lansing, MI 48824





**Table S2:** Improved HDGB parameters, dielectric profile ( $\epsilon$ ) and non-polar profile ( $\gamma$ )

| z    | $\epsilon(z)$ - old | $\epsilon(z)$ - new | z    | $\gamma(z)$ |
|------|---------------------|---------------------|------|-------------|
| 0.0  | 1.80                | 1.15                | 0.0  | 0.0000      |
| 0.5  | 1.80                | 1.15                | 0.6  | 0.0001      |
| 1.0  | 1.81                | 1.16                | 1.2  | 0.0002      |
| 1.5  | 1.82                | 1.17                | 1.8  | 0.0010      |
| 2.0  | 1.83                | 1.18                | 2.4  | 0.0050      |
| 2.5  | 1.84                | 1.19                | 3.0  | 0.0075      |
| 3.0  | 1.85                | 1.20                | 3.6  | 0.0100      |
| 3.5  | 1.86                | 1.21                | 4.2  | 0.0150      |
| 4.0  | 1.87                | 1.22                | 4.8  | 0.0200      |
| 4.5  | 1.89                | 1.24                | 5.4  | 0.0250      |
| 5.0  | 1.91                | 1.26                | 6.0  | 0.0300      |
| 5.5  | 1.93                | 1.28                | 6.6  | 0.0350      |
| 6.0  | 1.97                | 1.32                | 7.2  | 0.0410      |
| 6.5  | 2.00                | 1.35                | 7.8  | 0.0470      |
| 7.0  | 2.04                | 1.49                | 8.4  | 0.0520      |
| 7.5  | 2.09                | 1.64                | 9.0  | 0.0610      |
| 8.0  | 2.15                | 1.80                | 9.6  | 0.0720      |
| 8.5  | 2.22                | 1.87                | 10.2 | 0.0850      |
| 9.0  | 2.31                | 1.96                | 10.8 | 0.1000      |
| 9.5  | 2.41                | 2.06                | 11.4 | 0.1200      |
| 10.0 | 2.53                | 2.18                | 12.0 | 0.1500      |
| 10.5 | 3.23                | 2.28                | 12.6 | 0.1900      |
| 11.0 | 3.63                | 2.38                | 13.2 | 0.2500      |
| 11.5 | 4.13                | 2.58                | 13.8 | 0.3200      |
| 12.0 | 4.73                | 2.89                | 14.4 | 0.4000      |
| 12.5 | 5.43                | 3.42                | 15.0 | 0.5000      |
| 13.0 | 6.13                | 4.00                | 15.6 | 0.6200      |
| 13.5 | 6.98                | 5.08                | 16.2 | 0.7500      |
| 14.0 | 7.84                | 6.04                | 16.8 | 0.8753      |
| 14.5 | 8.80                | 7.50                | 17.4 | 0.9500      |
| 15.0 | 10.96               | 10.06               | 18.0 | 1.0308      |
| 15.5 | 14.05               | 13.75               | 18.6 | 1.0680      |
| 16.0 | 19.04               | 19.04               | 19.2 | 1.0921      |
| 16.5 | 25.85               | 25.85               | 19.8 | 1.1000      |
| 17.0 | 35.38               | 35.38               | 20.4 | 1.1000      |
| 17.5 | 45.88               | 45.88               | 21.0 | 1.0927      |
| 18.0 | 54.11               | 54.11               | 21.6 | 1.0690      |
| 18.5 | 60.79               | 60.79               | 22.2 | 1.0468      |
| 19.0 | 65.52               | 65.52               | 22.8 | 1.0328      |
| 19.5 | 69.42               | 69.42               | 23.4 | 1.0197      |
| 20.0 | 72.31               | 72.31               | 24.0 | 1.0130      |
| 20.5 | 74.07               | 74.07               | 24.6 | 1.0052      |
| 21.0 | 75.53               | 75.53               | 25.2 | 1.0005      |
| 21.5 | 76.63               | 76.63               | 25.8 | 1           |
| 22.0 | 77.14               | 77.14               | 26.4 | 1           |
| 22.5 | 77.83               | 77.83               | 27.0 | 1           |
| 23.0 | 78.22               | 78.22               | 27.6 | 1           |
| 23.5 | 78.92               | 78.92               | 28.2 | 1           |
| 24.0 | 79.35               | 79.35               | 28.8 | 1           |
| 24.5 | 79.66               | 79.66               | 29.4 | 1           |
| 25.0 | 80.00               | 80.00               | 30.0 | 1           |

## Figures

**Figure S1:** Amino acid analogs used in this study: acetamide (Asn), methanol (Ser), toluene (Phe) and propane (Val)

**Acetamide (Asn)**

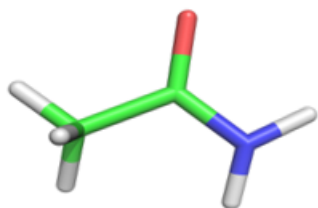

**Methanol (Ser)**

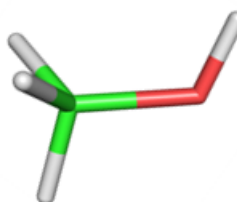

**Toluene (Phe)**

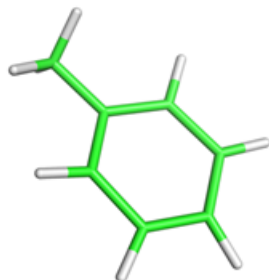

**Propane (Val)**

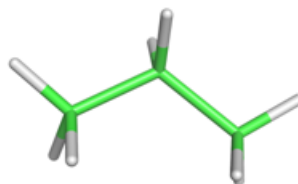

**Figure S2:** Root mean square deviation between the PMF profiles for each umbrella in forward and backward directions.

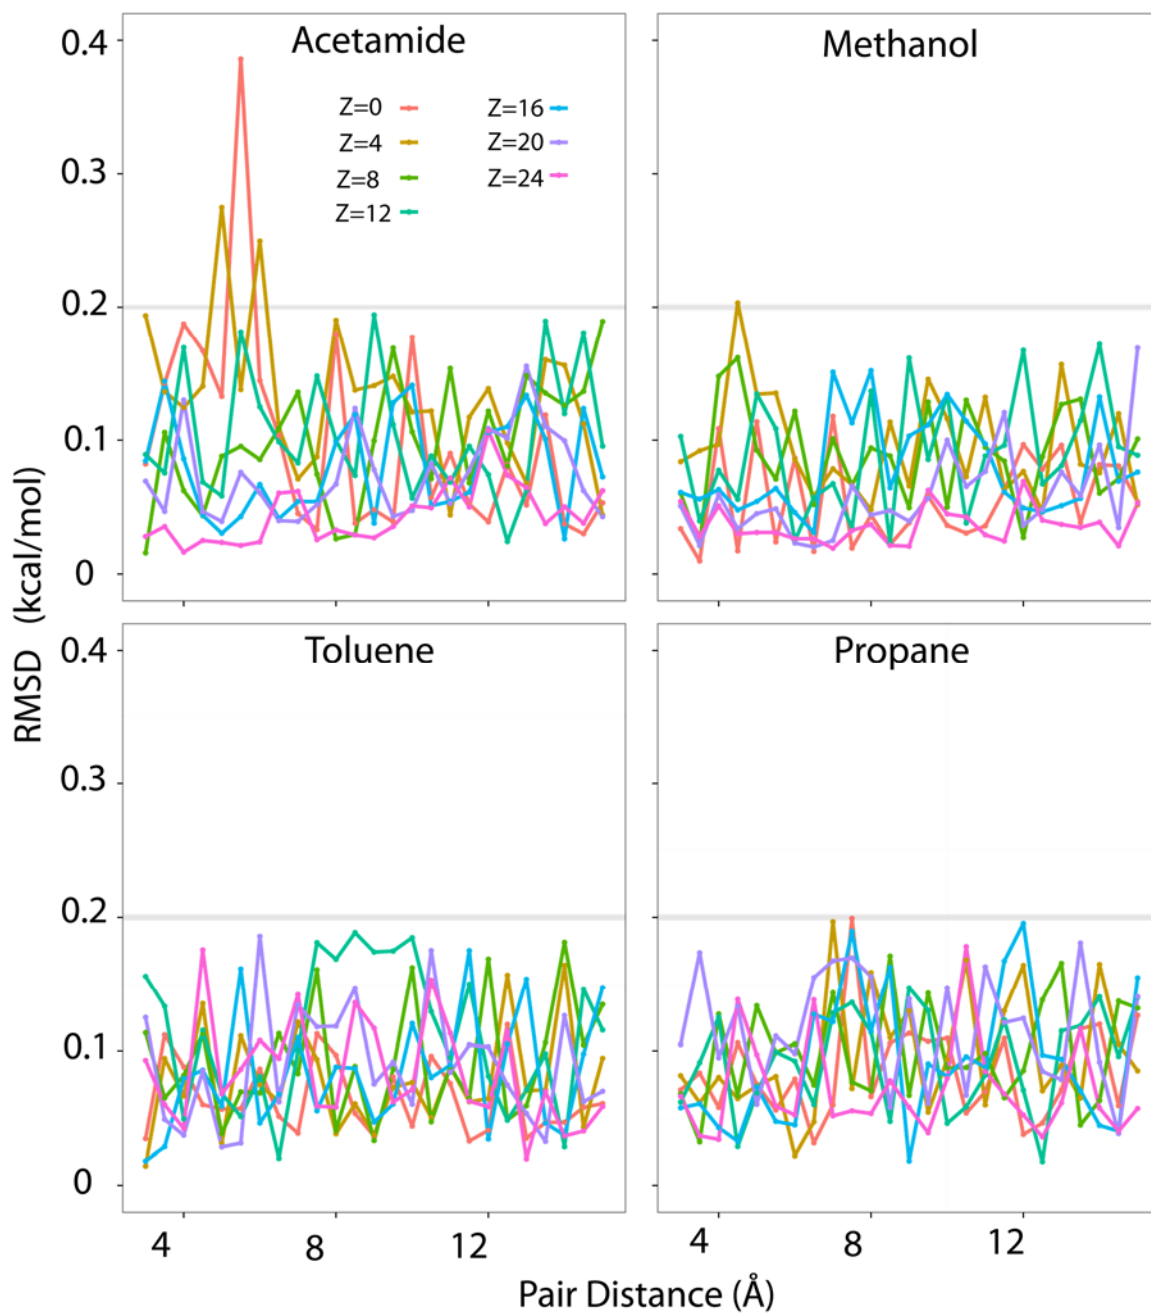

**Figure S3.** A: 2D PMF of acetamide pair association at  $z=0$  and water density in biasing cylinder; B: Corrected 1D PMF as a function of pair distance after Boltzmann averaging along the water density reaction coordinate.

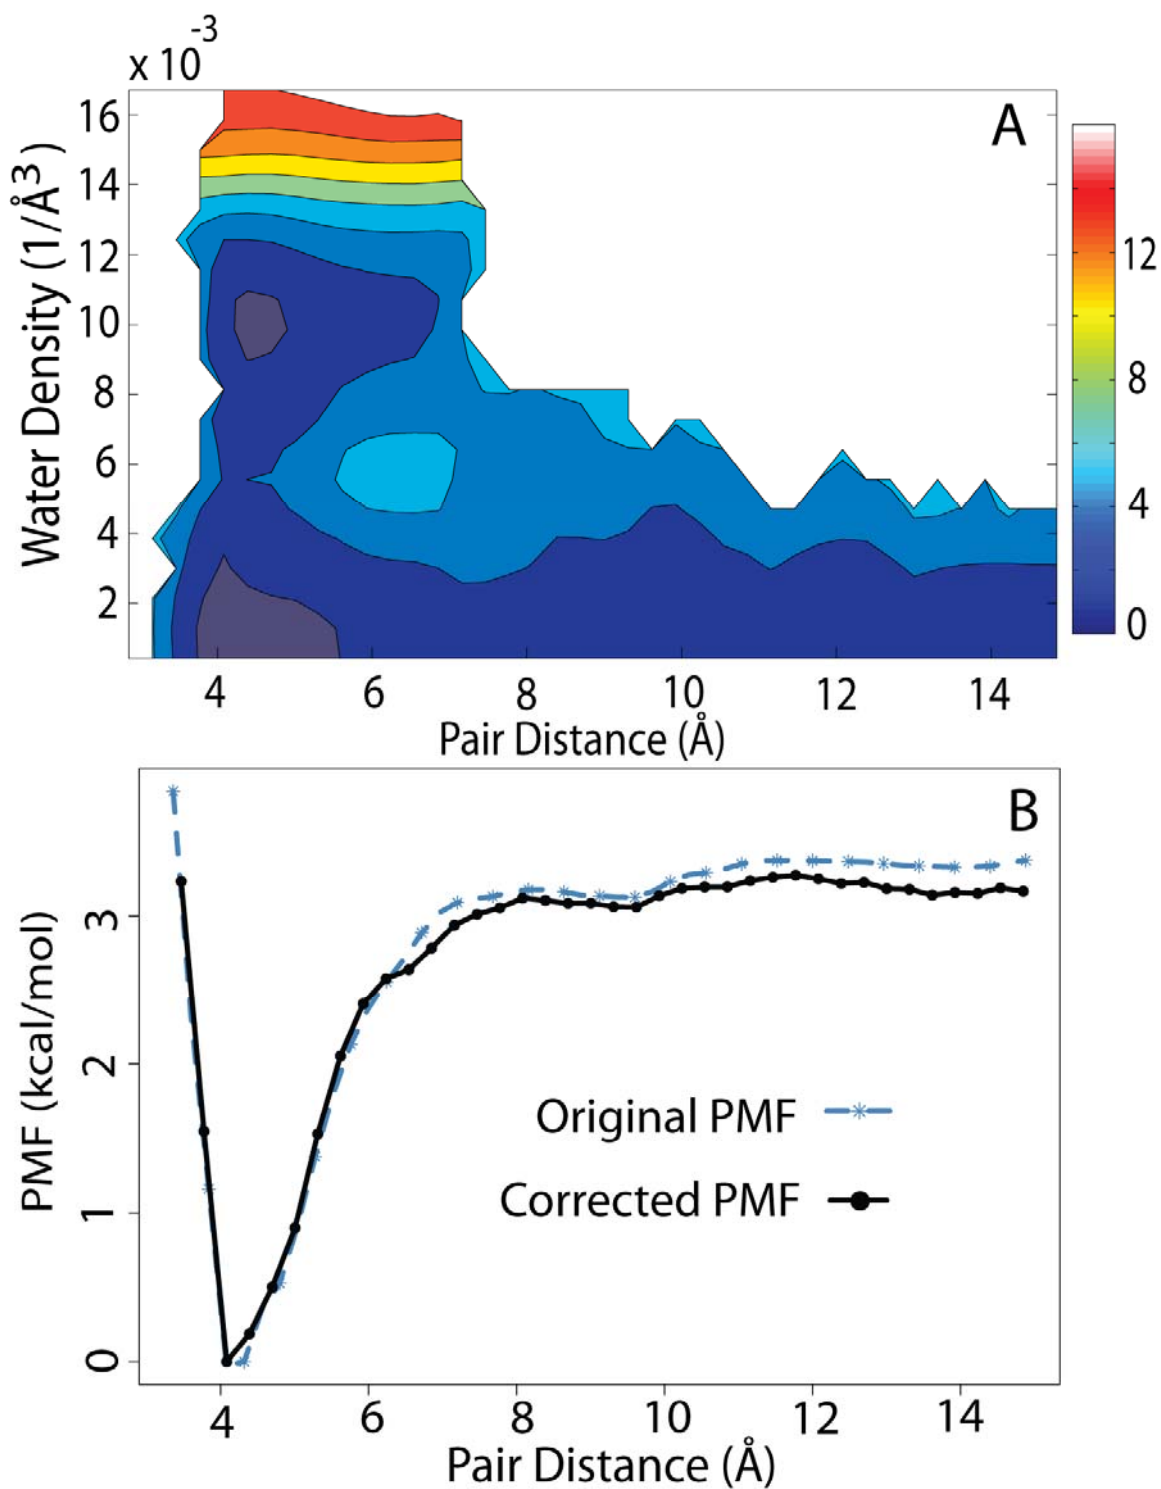

**Figure S4.** A: 2D PMF of methanol pair association at  $z=4$  Å and water density in biasing cylinder; B: Corrected 1D PMF as a function of pair distance after Boltzmann averaging along the water density reaction coordinate.

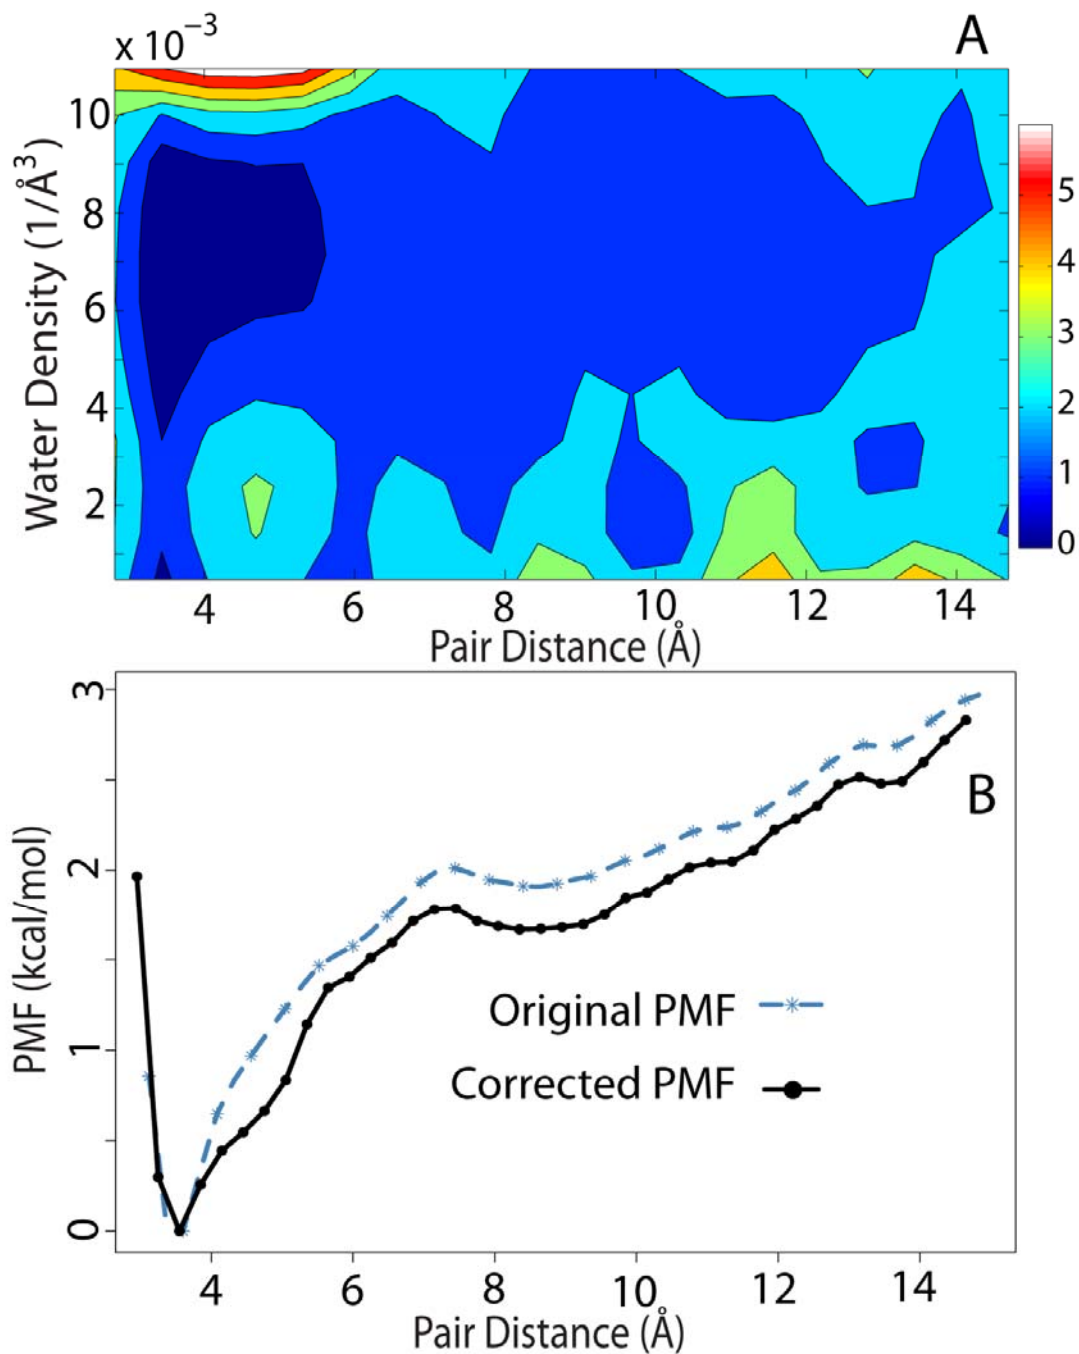



**Figure S5:** Free energy profiles of insertion of single amino acid side-chain analogs using HDGB simulations with old and improved parameters compared with results of explicit simulation<sup>1</sup> and experimental measurements<sup>2</sup>

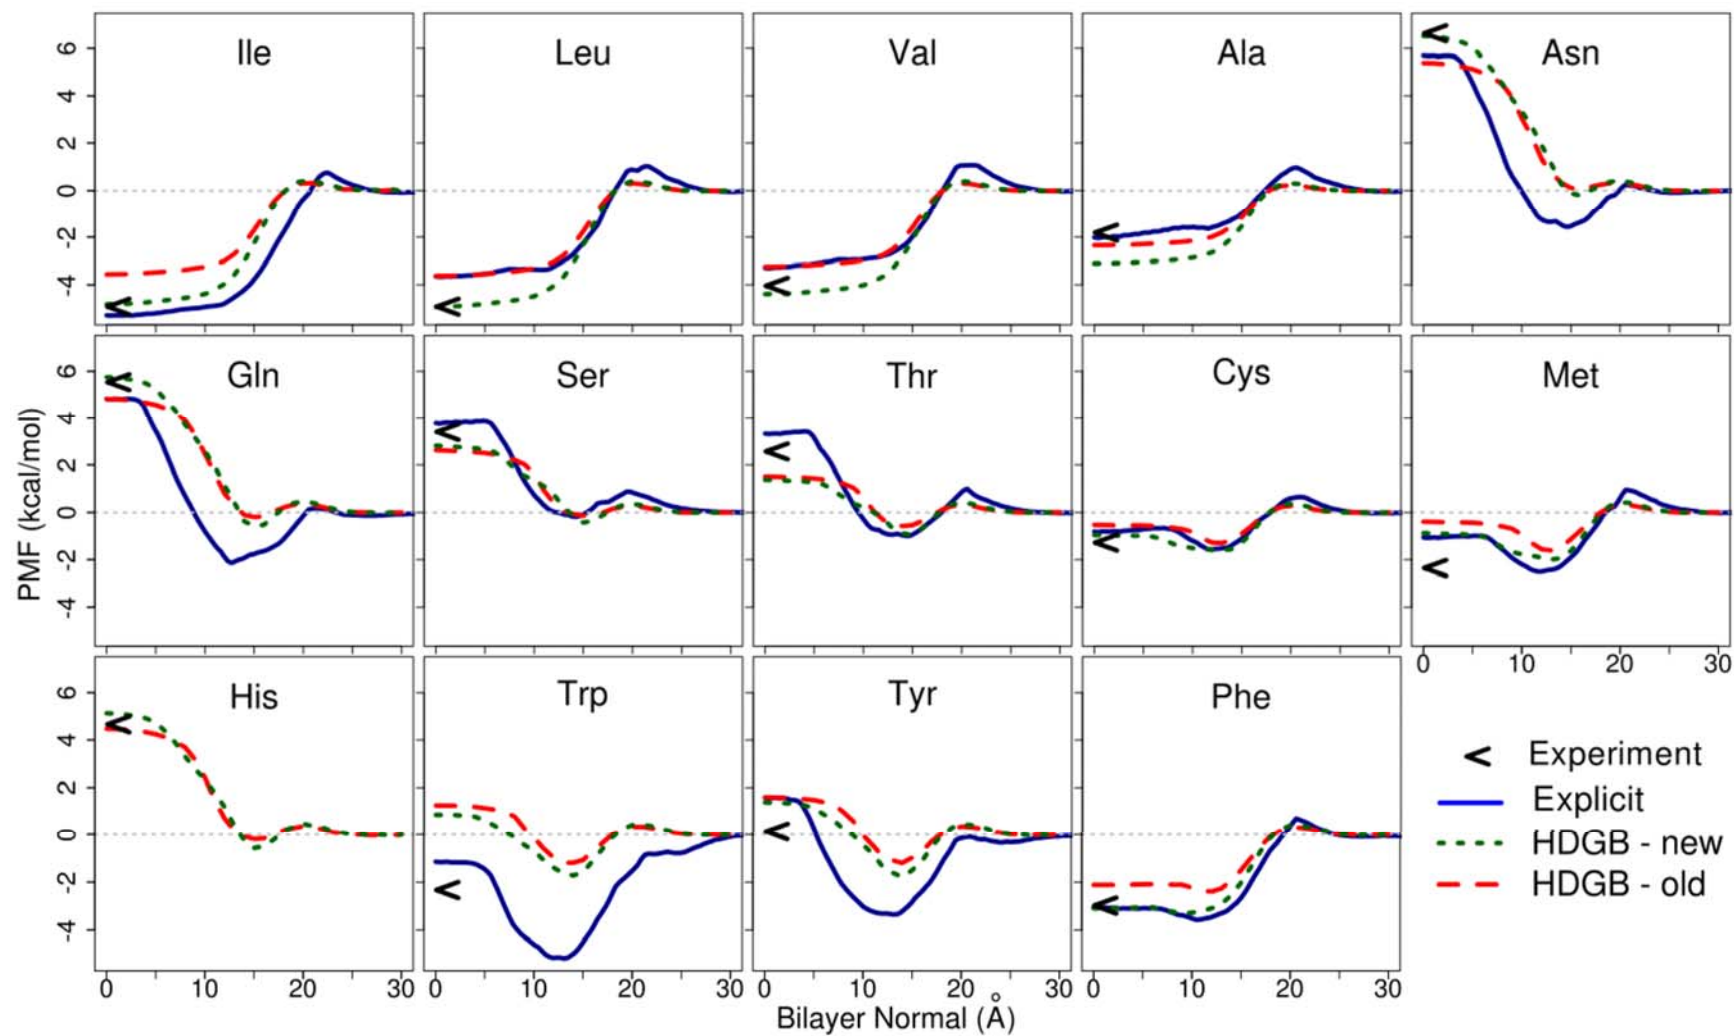

1. MacCallum JL, Bennett WFD, Tieleman DP. Distribution of Amino Acids in a Lipid Bilayer from Computer Simulations. *Biophys J* 2008;94:3393-3404.
2. Radzicka A, Wolfenden R. Comparing the polarities of the amino acids: side-chain distribution coefficients between the vapor phase, cyclohexane, 1-octanol, and neutral aqueous solution. *Biochemistry* 1988;27:1664-1670.
